# Supplementary material
Source: publisher figshare collection journal article supplement (https://plos.figshare.com/articles/dataset/_/1515764)
Supplement: Supplementary file [file 1]

**S1 Table - Codons Under Positive Diversifying Selection**

| <b>Codon</b> | <b><math>\alpha</math></b> | <b><math>\beta</math></b> | <b><math>\beta-\alpha</math></b> | <b>Posterior Prob <math>\beta&gt;\alpha</math></b> |
|--------------|----------------------------|---------------------------|----------------------------------|----------------------------------------------------|
| 66           | 0.301091                   | 4.66745                   | 4.36636                          | 0.976829                                           |
| 120          | 0.350605                   | 4.68078                   | 4.33017                          | 0.97017                                            |
| 187          | 0.323312                   | 4.30613                   | 3.98282                          | 0.970214                                           |
| 189          | 0.488929                   | 4.59146                   | 4.10253                          | 0.952346                                           |
| 334          | 0.515238                   | 4.81452                   | 4.29928                          | 0.957139                                           |
| 350          | 0.326471                   | 6.35042                   | 6.02395                          | 0.987242                                           |
| 351          | 0.384769                   | 9.89544                   | 9.51067                          | 0.993081                                           |
| 354          | 0.340685                   | 4.83471                   | 4.49403                          | 0.972795                                           |
| 356          | 0.344013                   | 5.97709                   | 5.63307                          | 0.983814                                           |
| 361          | 0.528979                   | 5.67777                   | 5.14879                          | 0.963                                              |
| 363          | 0.534201                   | 11.2879                   | 10.7537                          | 0.988671                                           |
| 367          | 0.492919                   | 4.89027                   | 4.39735                          | 0.960324                                           |
| 408          | 0.321548                   | 4.89743                   | 4.57588                          | 0.975818                                           |
| 460          | 0.339681                   | 4.47174                   | 4.13206                          | 0.969531                                           |
| 472          | 0.343514                   | 4.7033                    | 4.35978                          | 0.971396                                           |
| 488          | 0.375668                   | 12.4296                   | 12.0539                          | 0.996496                                           |
| 490          | 0.378753                   | 12.1675                   | 11.7888                          | 0.996492                                           |
| 491          | 0.321108                   | 5.0999                    | 4.77879                          | 0.977679                                           |
| 493          | 0.354172                   | 8.83888                   | 8.48471                          | 0.992952                                           |
| 494          | 0.322563                   | 5.9022                    | 5.57963                          | 0.985891                                           |
| 495          | 0.302877                   | 5.68572                   | 5.38285                          | 0.983874                                           |
| 500          | 0.596215                   | 5.83342                   | 5.2372                           | 0.957938                                           |
| 504          | 0.342009                   | 4.8593                    | 4.51729                          | 0.973169                                           |
