# Supplementary material
Source: publisher figshare collection journal article supplement (https://plos.figshare.com/articles/dataset/_/1515764)
Supplement: Supplementary file [file 1]

## S2 Table - Primers used in this study

|                                                                | Primer | Sequence                                                              |
|----------------------------------------------------------------|--------|-----------------------------------------------------------------------|
| <b><u>ROP5 CRISPR plasmids - Set1</u></b>                      |        |                                                                       |
| <b>pair1</b>                                                   |        |                                                                       |
| ROP5 CRISPR 5' of locus - for (sgRNA-1)                        | 5'     | GTA GTC GTG TGT ACA GTA TCG TTT TAG AGC TAG AAA TAG C 3'              |
| Universal sgRNA plasmid primer - rev (sgRNA-2)                 | 5'     | AAC TTG ACA TCC CCA TTT AC 3'                                         |
| <b>pair2</b>                                                   |        |                                                                       |
| ROP5 CRISPR 3' of locus - for                                  | 5'     | CCA CAA ACT GAA ATC CGA GAG TTT TAG AGC TAG AAA TAG C 3'              |
| Universal sgRNA plasmid primer - rev                           |        | see above                                                             |
| <b><u>Double CRISPR - Set2</u></b>                             |        |                                                                       |
| <b>pair1</b>                                                   |        |                                                                       |
| sgRNA cassette KpnI - for                                      | 5'     | CGA ATT GGG TAC CCA AGT AAG CAG AAG CAC GCT G 3'                      |
| sgRNA cassette XhoI - rev                                      | 5'     | TCG ACC TCG AGA ATT AAC CCT CAC TAA AGG 3'                            |
| <b><u>Gibson Cloning - Set3</u></b>                            |        |                                                                       |
| <b>pair1</b>                                                   |        |                                                                       |
| ROP5 5' homologous region + pUC19 - for                        | 5'     | TTT CCC AGT CAC GAC GTT CGA CGA AAC AGC AAC TGT GTG 3'                |
| ROP5 5' homologous region + M13F - rev                         | 5'     | CTG GCC GTC GTT TTA CAA ATT CGG GGG CCG GCT AG 3'                     |
| <b>pair2</b>                                                   |        |                                                                       |
| M13F + ROP5 5' homologous region - for                         | 5'     | ACT CAC TGA GGA ACC TAG CCG GCC CCC GAA TTC CAA AAA CGA CGG CCA GT 3' |
| M13R + ROP5 3' homologous region - rev                         | 5'     | ATG CAC GAA GCA CTA GCA CAG ATA CCG ATG AAC CAG GAA ACA GCT ATG AC 3' |
| <b>pair3</b>                                                   |        |                                                                       |
| ROP5 3' homologous region + M13R - for                         | 5'     | GTC ATA GCT GTT TCC TGG TTC ATC GGT ATC TGT GCT AGT GC 3'             |
| ROP5 3' homologous region + pUC19 - rev                        | 5'     | AGC GGA TAA CAA TTT CAC ACA TGG TCG AGG CCA TGG TCA 3'                |
| <b>pair4</b>                                                   |        |                                                                       |
| pUC19 for                                                      | 5'     | TGT GAA ATT GTT ATC CGC TC 3'                                         |
| pUC19 rev                                                      | 5'     | AAC GTC GTG ACT GGG AA 3'                                             |
| <b><u>ROP5 KO regions with DHFR*mCherry PCR amp - Set4</u></b> |        |                                                                       |
| <b>pair 1</b>                                                  |        |                                                                       |
| 5' ROP5 homologous region - for                                | 5'     | CGA CGA AAC AGC AAC TGT GTG 3'                                        |
| 3' ROP5 homologous region - rev                                | 5'     | CAT GGT CGA GGC CAT GGT CA 3'                                         |
| <b><u>ROP5 KO check - Set5</u></b>                             |        |                                                                       |
| <b>pair1</b>                                                   |        |                                                                       |
| 5' of ROP5 5' homologous region - for                          | 5'     | ACT ATG TCT TTG GTA CGA CCG CCG 3'                                    |
| DHFR promoter - rev                                            | 5'     | TAC CAG TCA TGG ACG AGA TCG 3'                                        |
| <b>pair2</b>                                                   |        |                                                                       |
| DHFR 3' UTR - for                                              | 5'     | ATA ATC TGC GAC CGC TGA ATC CGT 3'                                    |
| 3' of ROP5 3' homologous region - rev                          | 5'     | GTG ATC CTT GCA GAC GCT TG 3'                                         |
| <b>pair 3</b>                                                  |        |                                                                       |
| GRA1 promoter - for (pos control)                              | 5'     | AAA CCC TCG AAG GCT GCT AGT ACT 3'                                    |
| GRA1 promoter - rev (pos control)                              | 5'     | TCT TGC TTG ATT TCT TCA AAG AAC AAC AGC AAG 3'                        |
| <b><u>ROP18 KO check - Set6</u></b>                            |        |                                                                       |
| <b>pair1</b>                                                   |        |                                                                       |
| UpUp18 - for                                                   | 5'     | GAT CTT CAG CAG CCT GGT TC 3'                                         |
| DHFR promoter - rev                                            |        | see above                                                             |
| <b>pair2</b>                                                   |        |                                                                       |
| DHFR 3' UTR - for #2                                           | 5'     | CGA ACC ATG TCG AGG CTT TAA AGG A 3'                                  |
| DnDn18 - rev                                                   | 5'     | CAA ACC AAT CAC GAC CTC TG 3'                                         |
| <b>pair 3</b>                                                  |        |                                                                       |
| GRA1 promoter - for (pos control)                              |        | see above                                                             |
| GRA1 promoter - rev (pos control)                              |        | see above                                                             |
